# Supplementary material for: Hydrogen-bonded neutral and anionic lamellar networks: Crystal structures of bis(O,O′,O″-hydroorotato)disilver(i) dihydrate, potassium hydroorotate and rubidium hydroorotate. Ab initio calculations on orotic acid and the hydroorotate anion
Source: Royal Society of Chemistry journal article supplement (doi:10.1039/b110386p), 2002-01-01

**Table S2. Intramolecular geometry of orotic acid and the hydrooroatate anion in gas phase and crystalline surroundings.**

|                                | Orotic acid, H <sub>3</sub> L |                        |                         | Hydrooroatate anion, H <sub>2</sub> L <sup>-</sup> |                                |          |                               |          |                                |          |                                             |          | DFT (hydrooroatate) -<br>DFT (orotic acid) |
|--------------------------------|-------------------------------|------------------------|-------------------------|----------------------------------------------------|--------------------------------|----------|-------------------------------|----------|--------------------------------|----------|---------------------------------------------|----------|--------------------------------------------|
|                                | DFT <sup>(a)</sup>            | Crystal <sup>(b)</sup> | $\Delta$ <sup>(c)</sup> | DFT <sup>(a)</sup>                                 | Ag <sup>+</sup> <sup>(d)</sup> | $\Delta$ | K <sup>+</sup> <sup>(d)</sup> | $\Delta$ | Rb <sup>+</sup> <sup>(d)</sup> | $\Delta$ | NH <sub>4</sub> <sup>+</sup> <sup>(e)</sup> | $\Delta$ |                                            |
| N1-C2 (Å)                      | 1.391                         | 1.363                  | 0.028                   | 1.375                                              | 1.367                          | 0.008    | 1.390                         | -0.015   | 1.405                          | -0.030   | 1.370                                       | 0.005    | -0.016                                     |
| N1-C6                          | 1.376                         | 1.365                  | 0.011                   | 1.373                                              | 1.369                          | 0.004    | 1.360                         | 0.013    | 1.357                          | 0.016    | 1.372                                       | 0.001    | -0.003                                     |
| N3-C2                          | 1.396                         | 1.373                  | 0.023                   | 1.391                                              | 1.367                          | 0.024    | 1.386                         | 0.005    | 1.379                          | 0.012    | 1.396                                       | -0.005   | -0.005                                     |
| N3-C4                          | 1.413                         | 1.369                  | 0.044                   | 1.419                                              | 1.366                          | 0.053    | *                             | *        | *                              | *        | 1.368                                       | 0.051    | 0.006                                      |
| C4-C5                          | 1.464                         | 1.433                  | 0.031                   | 1.446                                              | 1.427                          | 0.019    | *                             | *        | *                              | *        | 1.443                                       | 0.003    | -0.018                                     |
| C5-C6                          | 1.354                         | 1.346                  | 0.008                   | 1.360                                              | 1.346                          | 0.014    | *                             | *        | *                              | *        | 1.347                                       | 0.013    | 0.006                                      |
| C6-C7                          | 1.494                         | 1.498                  | -0.004                  | 1.561                                              | 1.510                          | 0.051    | 1.535                         | 0.026    | 1.520                          | 0.041    | 1.524                                       | 0.037    | 0.067                                      |
| C2-O3                          | 1.215                         | 1.227                  | -0.012                  | 1.227                                              | 1.223                          | 0.004    | 1.225                         | 0.002    | 1.221                          | 0.006    | 1.221                                       | 0.006    | 0.012                                      |
| C4-O4                          | 1.219                         | 1.237                  | -0.018                  | 1.231                                              | 1.257                          | -0.026   | *                             | *        | *                              | *        | 1.233                                       | -0.002   | 0.012                                      |
| C7-O1                          | 1.343                         | 1.306                  | 0.037                   | 1.261                                              | 1.241                          | 0.020    | *                             | *        | *                              | *        | 1.247                                       | 0.014    | -0.082                                     |
| C7-O2                          | 1.214                         | 1.197                  | 0.017                   | 1.244                                              | 1.256                          | -0.012   | 1.225                         | 0.019    | 1.234                          | 0.010    | 1.250                                       | -0.006   | 0.030                                      |
| O1-C7-O2 (°)                   | 124.3                         | 125.5                  | -1.2                    | 131.9                                              | 127.4                          | 4.5      | 130.2                         | 1.7      | 126.9                          | 5.0      | 126.8                                       | 5.1      | 7.6                                        |
| C5-C6-C7                       | 124.9                         | 124.2                  | 0.7                     | 124.5                                              | 123.0                          | 1.5      | *                             | *        | *                              | *        | 122.2                                       | 2.3      | -0.4                                       |
| N1-C6-C7                       | 113.1                         | 114.1                  | -1.0                    | 112.7                                              | 116.1                          | -3.4     | 119.6                         | -6.9     | 119.7                          | -7.0     | 116.6                                       | -3.9     | -0.4                                       |
| C6-C7-O1                       | 113.1                         | 114.1                  | -1.0                    | 112.6                                              | 115.5                          | -2.9     | *                             | *        | *                              | *        | 116.7                                       | -4.1     | -0.5                                       |
| C6-C7-O2                       | 122.6                         | 120.4                  | 2.2                     | 115.6                                              | 117.1                          | -1.5     | *                             | *        | *                              | *        | 126.8                                       | -11.2    | -7.0                                       |
| dev. from plane <sup>(d)</sup> | 0                             | 0.0133                 |                         | 0.0                                                | 0.0608                         |          | 0 <sup>(f)</sup>              |          | 0 <sup>(f)</sup>               |          | 0.0415                                      |          |                                            |
| N3-C6-C7 <sup>(g)</sup> (°)    | 172.3                         | 173.2                  |                         | 171.9                                              | 175.3                          |          | 0 <sup>(f)</sup>              |          | 0 <sup>(f)</sup>               |          | 176.1                                       |          |                                            |

\* symmetry equivalents

a) B3LYP/6-311++G(2d,2p)

b) Orotic acid monohydrate. F. Takusagawa and A. Shimada. *Bull. Chem. Soc. Jpn.* 1973, 46, 2011.

c) d (DFT) - d (crystal)

d) Bis-hydrooroatato-disilver(I) monohydrate, potassium hydrooroatate and rubidium hydrooroatate. This work.

e) Ammonium hydrooroatate monohydrate. J. Solbakk, *Acta Chem. Scand.* 1971, 25, 3006.

d) Average atomic deviation from the least-squares plane defined by all atoms (Å).

f) Symmetry imposed.

g) Tilt angle of the carboxylic group defined as the angle between the line connecting N3-C6 and C6-C7.

Atomic numbering scheme:

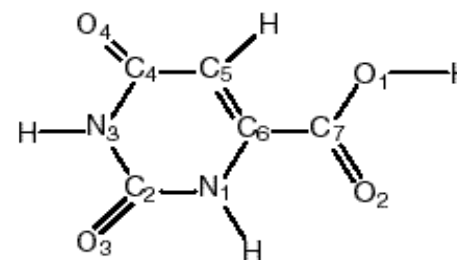

Supplement: b110386p-2.pdf [file b110386p-2.pdf]
