# Supplementary material for: Hydrogen-bonded neutral and anionic lamellar networks: Crystal structures of bis(O,O′,O″-hydroorotato)disilver(i) dihydrate, potassium hydroorotate and rubidium hydroorotate. Ab initio calculations on orotic acid and the hydroorotate anion
Source: Royal Society of Chemistry journal article supplement (doi:10.1039/b110386p), 2002-01-01

**Supplementary material:**

**Tables S3. Calculated and measured  $^1\text{H}$  (a) and  $^{13}\text{C}$  (b) chemical shifts for orotic acid;  $\text{H}_3\text{L}$ , and the hydroorotate anion,  $\text{H}_2\text{L}^-$ .**

**a) Calculated and measured  $^1\text{H}$  chemical shifts**

|    | Calculated                    |       |                                      |       | Experimental                 |                         |
|----|-------------------------------|-------|--------------------------------------|-------|------------------------------|-------------------------|
|    | Orotic acid<br>B3LYP HF/6-311 |       | Hydroorotate anion<br>B3LYP HF/6-311 |       | M $\text{H}_2\text{L}^{(a)}$ | Ag $\text{H}_2\text{L}$ |
| H1 | 7.244                         | 7.188 | 6.524                                | 6.481 | 10.57                        | 10.59                   |
| H3 | 7.631                         | 7.377 | 9.962                                | 9.610 | 11.24                        | 11.24                   |
| H5 | 6.408                         | 6.250 | 6.050                                | 5.781 | 6.18                         | 6.20                    |
| Hc | 6.509                         | 6.718 | -                                    | -     | -                            | -                       |

(a) M =  $\text{NH}_4^+$ ,  $\text{Li}^+$ ,  $\text{Na}^+$ ,  $\text{K}^+$ ,  $\text{Cs}^+$ ,  $\text{Rb}^+$

**b) Calculated and measured  $^{13}\text{C}$  chemical shifts**

|    | Calculated                    |         |                                      |         | Experimental                |
|----|-------------------------------|---------|--------------------------------------|---------|-----------------------------|
|    | Orotic acid<br>B3LYP HF/6-311 |         | Hydroorotate anion<br>B3LYP HF/6-311 |         | Hydroorotate anion $^{(b)}$ |
| C2 | 152.661                       | 158.362 | 155.399                              | 162.003 | 155.00                      |
| C4 | 167.066                       | 172.257 | 171.600                              | 178.195 | 170.29                      |
| C5 | 111.774                       | 110.293 | 99.975                               | 95.539  | 103.87                      |
| C6 | 143.856                       | 147.375 | 161.392                              | 169.166 | 150.97                      |
| C7 | 169.749                       | 171.888 | 164.168                              | 169.165 | 167.36                      |

(b) G. Maistralis, A. Koutsodimou and N. Katsaros. *Trans. Met. Chem.* 2000, **25**, 166.

**Atomic numbering scheme:**

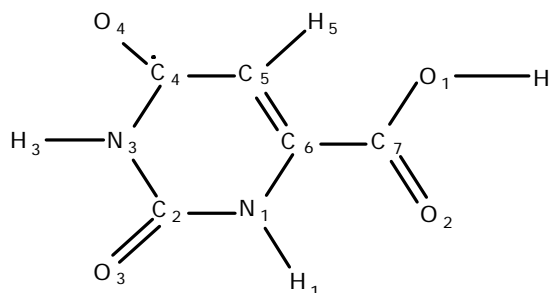

Supplement: b110386p-3.pdf [file b110386p-3.pdf]
