# Supplementary material for: Hydrogen-bonded neutral and anionic lamellar networks: Crystal structures of bis(O,O′,O″-hydroorotato)disilver(i) dihydrate, potassium hydroorotate and rubidium hydroorotate. Ab initio calculations on orotic acid and the hydroorotate anion
Source: Royal Society of Chemistry journal article supplement (doi:10.1039/b110386p), 2002-01-01
Supplement: b110386p-1.pdf [file b110386p-1.pdf]

## Supplementary material:

### Table S1. Energies and geometries of optimized structures

#### Orotic acid

##### **B3LYP/6-31G(d)**

E = -603.385856 Hartree

|                                              |                             |
|----------------------------------------------|-----------------------------|
| Zero-point correction=                       | 0.102063 (Hartree/Particle) |
| Thermal correction to Energy=                | 0.111024                    |
| Thermal correction to Enthalpy=              | 0.111969                    |
| Thermal correction to Gibbs Free Energy=     | 0.067305                    |
| Sum of electronic and zero-point Energies=   | -603.283793                 |
| Sum of electronic and thermal Energies=      | -603.274832                 |
| Sum of electronic and thermal Enthalpies=    | -603.273887                 |
| Sum of electronic and thermal Free Energies= | -603.318551                 |

##### **HF/6-311++G(2d,2p)**

E = -603.0817693 Hartree

##### **Optimized geometry (B3LYP/6-31G(d))**

| Center Number | Atomic Number | Coordinates (Å) |           |           |
|---------------|---------------|-----------------|-----------|-----------|
|               |               | X               | Y         | Z         |
| 1             | 7             | 2.011486        | 0.023676  | -0.000004 |
| 2             | 6             | 1.360960        | 1.252834  | -0.000004 |
| 3             | 7             | -0.024187       | 1.126697  | -0.000001 |
| 4             | 6             | -0.683443       | -0.080434 | 0.000001  |
| 5             | 6             | -0.019319       | -1.259621 | 0.000001  |
| 6             | 6             | 1.444833        | -1.265297 | -0.000002 |
| 7             | 1             | 3.024599        | 0.067696  | -0.000006 |
| 8             | 8             | 1.932825        | 2.324684  | -0.000005 |
| 9             | 1             | -0.573503       | 1.978754  | 0.000000  |
| 10            | 6             | -2.170430       | 0.063829  | 0.000004  |
| 11            | 8             | -2.815132       | -1.114355 | 0.000006  |
| 12            | 8             | -2.721981       | 1.144983  | 0.000005  |
| 13            | 1             | -0.537486       | -2.207665 | 0.000002  |
| 14            | 8             | 2.147982        | -2.261136 | -0.000003 |
| 15            | 1             | -3.769855       | -0.912675 | 0.000008  |

## Tables S1, continued

### Hydroorotate anion

#### **B3LYP/6-31G(d)**

E = -602.8581565 Hartree

1

|                                              |                             |
|----------------------------------------------|-----------------------------|
| Zero-point correction=                       | 0.088913 (Hartree/Particle) |
| Thermal correction to Energy=                | 0.09755                     |
| Thermal correction to Enthalpy=              | 0.098494                    |
| Thermal correction to Gibbs Free Energy=     | 0.054454                    |
| Sum of electronic and zero-point Energies=   | -602.769243                 |
| Sum of electronic and thermal Energies=      | -602.760606                 |
| Sum of electronic and thermal Enthalpies=    | -602.759662                 |
| Sum of electronic and thermal Free Energies= | -602.803703                 |

#### **HF/6-311++G(2d,2p)**

E = -603.0817693 Hartree

#### **Optimized geometry (B3LYP/6-31G(d))**

| Center<br>Number | Atomic<br>Number | Coordinates (Å) |           |           |
|------------------|------------------|-----------------|-----------|-----------|
|                  |                  | X               | Y         | Z         |
| 1                | 7                | -1.949920       | 0.117421  | 0.000022  |
| 2                | 6                | -1.213048       | 1.296879  | -0.000006 |
| 3                | 7                | 0.141234        | 1.061528  | 0.000007  |
| 4                | 6                | 0.726633        | -0.179630 | 0.000011  |
| 5                | 6                | -0.029932       | -1.309436 | 0.000014  |
| 6                | 6                | -1.472788       | -1.218251 | 0.000009  |
| 7                | 1                | -2.955755       | 0.228482  | -0.000012 |
| 8                | 8                | -1.732152       | 2.408714  | -0.000034 |
| 9                | 1                | 0.833016        | 1.815407  | 0.000009  |
| 10               | 6                | 2.285403        | -0.109083 | 0.000001  |
| 11               | 8                | 2.872315        | -1.205710 | -0.000047 |
| 12               | 8                | 2.715854        | 1.075662  | 0.000036  |
| 13               | 1                | 0.452462        | -2.277196 | 0.000011  |
| 14               | 8                | -2.286832       | -2.141442 | -0.000003 |
