# Supplementary material for: Hydrogen-bonded neutral and anionic lamellar networks: Crystal structures of bis(O,O′,O″-hydroorotato)disilver(i) dihydrate, potassium hydroorotate and rubidium hydroorotate. Ab initio calculations on orotic acid and the hydroorotate anion
Source: Royal Society of Chemistry journal article supplement (doi:10.1039/b110386p), 2002-01-01
Supplement: b110386p-4.pdf [file b110386p-4.pdf]

Supplementary material:

Tables S4. Observed and calculated IR frequencies for selected vibrations of orotic acid and the hydroorotate anion.

| Orotic acid, H <sub>3</sub> L |          |                       |                       |                        |                  |                       |
|-------------------------------|----------|-----------------------|-----------------------|------------------------|------------------|-----------------------|
| Observed                      |          | Calculated (ref. 1)   |                       | Calculated (this work) |                  |                       |
| v (cm <sup>-1</sup> )         |          | v (cm <sup>-1</sup> ) | assignment            | v (cm <sup>-1</sup> )  | I <sub>rel</sub> | assignment            |
| 3241                          | sh       | 3796                  | v (O-H)               | 3696                   | 0.17             | v (O-H)               |
| 3154                          | m, broad | 3637                  | v (N <sub>1</sub> -H) | 3603                   | 0.07             | v (N <sub>3</sub> -H) |
| 3137                          | m, broad | 3614                  | v (N <sub>3</sub> -H) | 3601                   | 0.27             | v (N <sub>1</sub> -H) |
| 3099                          | sh       | 3266                  | v (C-H)               | 3285                   | 0.01             | v (C-H)               |
| 1729                          | vs       | 1858                  | v (O=O <sub>1</sub> ) | 1849                   | 0.94             | v (O=O <sub>3</sub> ) |
| 1719                          | vs       | 1849                  | v (C=O <sub>3</sub> ) | 1826                   | 0.46             | v (C=O <sub>1</sub> ) |
| 1700                          | vs       | 1807                  | v (C=O <sub>4</sub> ) | 1805                   | 1.00             | v (C=O <sub>4</sub> ) |
| 1653                          | vs       | 1698                  | v (C=C)               | 1688                   | 0.07             | v (C=C)               |

1) A. Hernanz, F. Billes, I. Bratu and R. Navarro. *Biopolymers*, 2000, 57, 187. (DFT - Becke3P86/6-311G\*\*)

| Hydroorotate anion, H <sub>2</sub> L <sup>-</sup> |       |                                                                                    |       |                                            |                  |                                       |
|---------------------------------------------------|-------|------------------------------------------------------------------------------------|-------|--------------------------------------------|------------------|---------------------------------------|
| KH <sub>2</sub> L (s), observed                   |       | Ag <sub>2</sub> (H <sub>2</sub> L) <sub>2</sub> · 2 H <sub>2</sub> O (s), observed |       | H <sub>2</sub> L <sup>-</sup> , calculated |                  |                                       |
| v (cm <sup>-1</sup> )                             |       | v (cm <sup>-1</sup> )                                                              |       | v (cm <sup>-1</sup> )                      | I <sub>rel</sub> | assignment                            |
| -                                                 | -     | 3450                                                                               | broad | -                                          | -                | v <sub>s, as</sub> (H <sub>2</sub> O) |
| 3158                                              | m     | 3150                                                                               | m     | 3620                                       | 0.06             | v (N <sub>3</sub> -H)                 |
| 3108                                              | m     | 3100                                                                               | m     | 3453                                       | 0.51             | v (N <sub>1</sub> -H)                 |
| 3087                                              | m     | 3000                                                                               | m     | 3268                                       | 0.002            | v (C-H)                               |
| 1705                                              | sh    | 1700                                                                               | sh    | 1807                                       | 1.00             | v (O=O <sub>3</sub> )                 |
| 1677                                              | sh    | 1672                                                                               | sh    | 1782                                       | 0.96             | v <sub>asym</sub> (COO)               |
| 1676                                              | broad | 1670                                                                               | broad | 1768                                       | 1.90             | v (C=O <sub>4</sub> )                 |
| 1615                                              | m     | 1620                                                                               | m     | 1664                                       | 0.17             | v (C=C)                               |
| 1492                                              | m     | 1490                                                                               | m     | 1495                                       | 0.52             | Ring vibration                        |
| 1472                                              | w     | 1473                                                                               | w     | 1405                                       | 0.03             | Ring vibration                        |
| 1423                                              | w     | 1415                                                                               | w     | 1385                                       | 0.02             | δ (N-H)                               |
| 1377                                              | sh    | 1375                                                                               | sh    | 1342                                       | 0.73             | v <sub>sym</sub> (COO)                |
| 1311                                              | w     | 1305                                                                               | m     | 1280                                       | 0.01             | δ (N-H)                               |
